# Supplementary material for: Plant Reactome: a knowledgebase and resource for comparative pathway analysis
Source: PubMed Central journal article supplement (PMC7145600; doi:10.1093/nar/gkz996), 2019-11-04
Supplement: gkz996_supplemental_file.pdf [file gkz996_supplemental_file.pdf]

## SUPPLEMENTARY MATERIAL

**Supplementary Table S1:** A list of 83 plant species available in the Plant Reactome for comparative pathway analysis. The reference pathways were curated manually in rice (*Oryza sativa*) and subsequently, projected to other 82 species based on gene-orthology. The red-colored cells depict higher counts whereas shades of yellow to blue represent lower counts of the pathways, reactions, and genes/gene products. Details of an external source of data for each species (including a link) and the method employed for determining orthology are also listed. The \* denotes that in the given species transcriptome assembly (instead of genome assembly) was used for pathway projection.

**Supplementary Table S2:** A list of updates in Plant Reactome knowledgebase covering Gramene release #52-61.

**Supplementary Table S3:** A list of interactors retrieved from Plant Interactome datasets for genes involved in the methylerythritol pathway (MEP). A few interactors discussed in the text are highlighted in yellow color.

**Supplementary Figure S1:** A view of the Plant Reactome homepage and associated functionalities.

**Supplementary Figure S2:** An example of a plant development pathway ‘Regulation of embryo development’ shows major transcriptional events associated with this developmental stage and connections to other metabolic and signaling pathways and gene products located in various organelles.

**Supplementary Figure S3:** Examples of internal Neo4j knowledge graph views, queries, and data formats, which are then consumed by the Plant Reactome application.

**Supplementary Figure S4:** Content Service Swagger interface components (<https://plantreactome.gramene.org/ContentService/>), consisting of a listing of available RESTful web service method calls, the query test form, the curl command that is executed to retrieve the data, and returned data in JSON format.

**Supplementary Figure S5:** Embeddable DiagramJs pathway widget, with constituent examples at Gramene and Ensembl.

**Supplementary Figure S6:** Integration of Plant Reactome data on NCBI PubChem site. An example of the thiamine biosynthesis pathway showing links to PubChem Compound, Protein, and Gene pages using the molecular entities identified in a Plant Reactome.

**Supplementary Figure S7:** Integration of Plant Reactome data with the EMBL-EBI Expression Atlas. Users can now search for plant pathways and associated data at the Expression Atlas website as well as access basal expression profiles of genes associated with Plant Reactome reactions and pathways. Expression Atlas also provides a “gene information card” view for individual genes and links to various Plant Reactome pathways.

**Supplementary Table S1:** A list of 83 plant species available in the Plant Reactome for comparative pathway analysis. The reference pathways were curated manually in rice (*Oryza sativa*) and subsequently, projected to another 82 species based on gene-orthology. The red-colored cells depict a higher count whereas shades of yellow to blue represent lower counts of the pathways, reactions, and genes/gene products. Details of external source of data for each species (including link) and method employed for determining orthology are also listed. The \* denotes that in the given species transcriptome assembly (instead of genome assembly) was used for pathway projection.

|                                               |                                   | Taxa                         | Pathways                    | Reactions                      | Gene products   | Sequence source | Homology method          |                 |            |
|-----------------------------------------------|-----------------------------------|------------------------------|-----------------------------|--------------------------------|-----------------|-----------------|--------------------------|-----------------|------------|
| Angiosperm                                    | Dicot                             | Matric                       | <i>Arabidopsis halleri</i>  | 235                            | 582             | 1021            | Ensembl Gramene          | Compara         |            |
|                                               |                                   |                              | <i>Arabidopsis lyrata</i>   | 235                            | 584             | 1053            | Ensembl Gramene          | Compara         |            |
|                                               |                                   |                              | <i>Arabidopsis thaliana</i> | 236                            | 590             | 1059            | Ensembl Gramene          | Compara         |            |
|                                               |                                   |                              | <i>Brassica oleracea</i>    | 236                            | 581             | 1619            | Ensembl Gramene          | Compara         |            |
|                                               |                                   |                              | <i>Brassica napus</i>       | 238                            | 590             | 3209            | Ensembl Gramene          | Compara         |            |
|                                               |                                   |                              | <i>Brassica rapa</i>        | 235                            | 578             | 1598            | Ensembl Gramene          | Compara         |            |
|                                               |                                   |                              | <i>Citrus sinensis</i>      | 240                            | 594             | 2366            | Phytozome                | Inparanoid      |            |
|                                               |                                   |                              | <i>Corchorus capsularis</i> | 233                            | 554             | 781             | Ensembl Gramene          | Compara         |            |
|                                               |                                   |                              | <i>Gossypium raimondii</i>  | 238                            | 602             | 1420            | Ensembl Gramene          | Compara         |            |
|                                               |                                   |                              | <i>Populus trichocarpa</i>  | 236                            | 596             | 1329            | Ensembl Gramene          | Compara         |            |
|                                               |                                   |                              | <i>Theobroma cacao</i>      | 238                            | 598             | 877             | Ensembl Gramene          | Compara         |            |
|                                               |                                   |                              | <i>Arachis duranensis</i>   | 245                            | 624             | 1057            | PeanutBase               | Inparanoid      |            |
|                                               |                                   |                              | <i>Arachis ipaensis</i>     | 240                            | 594             | 949             | PeanutBase               | Inparanoid      |            |
|                                               |                                   |                              | <i>Cajanus cajan</i>        | 240                            | 602             | 1235            | LegumeInfo               | Inparanoid      |            |
|                                               |                                   |                              | <i>Cicer arietinum</i>      | 241                            | 595             | 1461            | NCBI                     | Inparanoid      |            |
|                                               |                                   | <i>Cucumis sativus</i>       | 237                         | 590                            | 834             | Ensembl Gramene | Compara                  |                 |            |
|                                               |                                   | <i>Fragaria vesca</i>        | 240                         | 566                            | 1014            | Phytozome       | Inparanoid               |                 |            |
|                                               |                                   | <i>Glycine max</i>           | 236                         | 599                            | 1947            | Ensembl Gramene | Compara                  |                 |            |
|                                               |                                   | <i>Trifolium pratense</i>    | 237                         | 588                            | 1006            | Ensembl Gramene | Compara                  |                 |            |
|                                               |                                   | <i>Jatropha curcas</i>       | 213                         | 493                            | 534             | KDRI (Kazusa)   | Inparanoid               |                 |            |
|                                               |                                   | <i>Lupinus angustifolius</i> | 237                         | 597                            | 1430            | Ensembl Gramene | Compara                  |                 |            |
|                                               |                                   | <i>Malus domestica</i>       | 238                         | 576                            | 2009            | PMID: 20802477  | Inparanoid               |                 |            |
|                                               |                                   | <i>Manihot esculenta</i>     | 236                         | 597                            | 1180            | Ensembl Gramene | Compara                  |                 |            |
|                                               |                                   | <i>Medicago truncatula</i>   | 236                         | 587                            | 1182            | Ensembl Gramene | Compara                  |                 |            |
|                                               |                                   | <i>Phaseolus vulgaris</i>    | 239                         | 599                            | 1065            | Ensembl Gramene | Compara                  |                 |            |
|                                               | <i>Prunus persica</i>             | 239                          | 606                         | 944                            | Ensembl Gramene | Compara         |                          |                 |            |
|                                               | <i>Vigna angularis</i>            | 237                          | 582                         | 1003                           | Ensembl Gramene | Compara         |                          |                 |            |
|                                               | <i>Vigna radiata</i>              | 226                          | 543                         | 891                            | Ensembl Gramene | Compara         |                          |                 |            |
|                                               | <b>Myrtales</b>                   | <i>Eucalyptus grandis</i>    | 215                         | 501                            | 707             | Phytozome       | Inparanoid               |                 |            |
|                                               | <b>Vitales</b>                    | <i>Vitis vinifera</i>        | 238                         | 602                            | 930             | Ensembl Gramene | Compara                  |                 |            |
|                                               | <b>Caryophyllales</b>             | <i>Beta vulgaris</i>         | 235                         | 576                            | 747             | Ensembl Gramene | Compara                  |                 |            |
|                                               | Asterid                           | <i>Actinidia chinensis</i>   | 238                         | 594                            | 1410            | Ensembl Gramene | Compara                  |                 |            |
|                                               |                                   | <i>Helianthus annuus</i>     | 237                         | 590                            | 1576            | Ensembl Gramene | Compara                  |                 |            |
|                                               |                                   | <i>Capsicum annuum</i>       | 242                         | 583                            | 1214            | PMID: 24441736  | Inparanoid               |                 |            |
|                                               |                                   | <i>Coffea canephora</i>      | 240                         | 590                            | 1050            | PMID:25190796   | Inparanoid               |                 |            |
|                                               |                                   | <i>Daucus carota</i>         | 235                         | 574                            | 1091            | Ensembl Gramene | Compara                  |                 |            |
|                                               |                                   | <i>Nicotiana attenuata</i>   | 232                         | 507                            | 703             | Ensembl Gramene | Compara                  |                 |            |
|                                               |                                   | <i>Solanum lycopersicum</i>  | 235                         | 583                            | 968             | Ensembl Gramene | Compara                  |                 |            |
|                                               |                                   | <i>Solanum tuberosum</i>     | 229                         | 561                            | 967             | Ensembl Gramene | Compara                  |                 |            |
|                                               |                                   | <i>Dioscorea rotundata</i>   | 222                         | 480                            | 605             | Ensembl Gramene | Compara                  |                 |            |
|                                               |                                   | Monocot                      | Poales                      | <i>Aegilops tauschii</i>       | 236             | 627             | 1123                     | Ensembl Gramene | Compara    |
|                                               |                                   |                              |                             | <i>Brachypodium distachyon</i> | 231             | 619             | 1031                     | Ensembl Gramene | Compara    |
|                                               |                                   |                              |                             | <i>Hordeum vulgare</i>         | 234             | 596             | 1043                     | Ensembl Gramene | Compara    |
|                                               |                                   |                              |                             | <i>Leersia perrieri</i>        | 236             | 618             | 1001                     | Ensembl Gramene | Compara    |
|                                               |                                   |                              |                             | <i>Oryza australiensis</i> *   | 234             | 545             | 1704                     | OMAP/OGE        | Inparanoid |
|                                               |                                   |                              |                             | <i>Oryza barthii</i>           | 238             | 642             | 1057                     | Ensembl Gramene | Compara    |
|                                               | <i>Oryza brachyantha</i>          |                              |                             | 236                            | 625             | 1013            | Ensembl Gramene          | Compara         |            |
|                                               | <i>Oryza glaberrima</i>           |                              |                             | 242                            | 636             | 1051            | Ensembl Gramene          | Compara         |            |
|                                               | <i>Oryza glumaepatula</i>         |                              |                             | 239                            | 642             | 1066            | Ensembl Gramene          | Compara         |            |
|                                               | <i>Oryza granulata</i> *          |                              |                             | 239                            | 568             | 3509            | OMAP/OGE                 | Inparanoid      |            |
|                                               | <i>Oryza kasalath</i>             |                              |                             | 191                            | 287             | 365             | PMID: 24578372           | Inparanoid      |            |
|                                               | <i>Oryza longistaminata</i> *     |                              |                             | 236                            | 604             | 917             | Ensembl Gramene          | Compara         |            |
|                                               | <i>Oryza meridionalis</i>         |                              |                             | 233                            | 581             | 914             | Ensembl Gramene          | Compara         |            |
|                                               | <i>Oryza minuta</i> *             |                              |                             | 240                            | 588             | 2092            | OMAP/OGE                 | Inparanoid      |            |
|                                               | <i>Oryza nivara</i>               |                              |                             | 238                            | 652             | 1066            | Ensembl Gramene          | Compara         |            |
| <i>Oryza officinalis</i> *                    | 237                               |                              |                             | 579                            | 1882            | OMAP/OGE        | Inparanoid               |                 |            |
| <i>Oryza punctata</i>                         | 235                               |                              |                             | 628                            | 1067            | Ensembl Gramene | Compara                  |                 |            |
| <i>Oryza rufipogon</i>                        | 238                               |                              |                             | 641                            | 1076            | Ensembl Gramene | Compara                  |                 |            |
| <i>Oryza sativa Indica</i>                    | 242                               |                              |                             | 664                            | 1157            | Ensembl Gramene | Compara                  |                 |            |
| <b>Oryza sativa (REFERENCE)</b>               | <b>298</b>                        |                              |                             | <b>1723</b>                    | <b>1824</b>     | <b>UniProt</b>  | <b>Curated Reference</b> |                 |            |
| <i>Panicum hallii</i> FIL2                    | 235                               |                              |                             | 639                            | 1076            | Ensembl Gramene | Compara                  |                 |            |
| <i>Panicum hallii</i> var. <i>hallii</i> HAL2 | 237                               |                              |                             | 642                            | 1109            | Ensembl Gramene | Compara                  |                 |            |
| <i>Setaria italica</i>                        | 237                               |                              |                             | 631                            | 1114            | Ensembl Gramene | Compara                  |                 |            |
| <i>Sorghum bicolor</i>                        | 237                               |                              |                             | 639                            | 1095            | Ensembl Gramene | Compara                  |                 |            |
| <i>Triticum aestivum</i>                      | 238                               |                              |                             | 642                            | 3574            | Ensembl Gramene | Compara                  |                 |            |
| <i>Triticum dicoccoides</i>                   | 238                               |                              |                             | 634                            | 2123            | Ensembl Gramene | Compara                  |                 |            |
| <i>Triticum turgidum</i> *                    | 238                               |                              |                             | 597                            | 2753            | PMID: 23800085  | Inparanoid               |                 |            |
| <i>Triticum urartu</i>                        | 229                               |                              |                             | 544                            | 864             | Ensembl Gramene | Compara                  |                 |            |
| <i>Zea mays</i>                               | 235                               |                              |                             | 621                            | 1380            | Ensembl Gramene | Compara                  |                 |            |
| <b>Zingiberales</b>                           | <i>Musa acuminata</i>             |                              |                             | 227                            | 566             | 1280            | Ensembl Gramene          | Compara         |            |
| <b>Arecales</b>                               | <i>Phoenix dactylifera</i>        | 234                          | 557                         | 1097                           | PMID: 23917264  | Inparanoid      |                          |                 |            |
| <b>Amborellae</b>                             | <i>Amborella trichopoda</i>       | 236                          | 573                         | 682                            | Ensembl Gramene | Compara         |                          |                 |            |
| <b>Gymnosperm</b>                             | <i>Picea abies</i>                | 236                          | 530                         | 1315                           | Congenie        | Inparanoid      |                          |                 |            |
|                                               | <i>Pinus taeda</i>                | 225                          | 475                         | 1308                           | TreeBase        | Inparanoid      |                          |                 |            |
| <b>Lycopod</b>                                | <i>Selaginella moellendorffii</i> | 220                          | 522                         | 1226                           | Ensembl Gramene | Compara         |                          |                 |            |
| <b>Bryophyte</b>                              | <i>Physcomitrella patens</i>      | 214                          | 513                         | 1060                           | Ensembl Gramene | Compara         |                          |                 |            |
| <b>Chlorophyte</b>                            | <i>Ostreococcus lucimarinus</i>   | 156                          | 274                         | 226                            | Ensembl Gramene | Compara         |                          |                 |            |
|                                               | <i>Chlamydomonas reinhardtii</i>  | 164                          | 332                         | 273                            | Ensembl Gramene | Compara         |                          |                 |            |
| <b>Rhodophyte</b>                             | <i>Chondrus crispus</i>           | 140                          | 210                         | 183                            | Ensembl Gramene | Compara         |                          |                 |            |
|                                               | <i>Galdieria sulphuraria</i>      | 152                          | 253                         | 206                            | Ensembl Gramene | Compara         |                          |                 |            |
|                                               | <i>Cyanidioschyzon merolae</i>    | 142                          | 216                         | 169                            | Ensembl Gramene | Compara         |                          |                 |            |
| <b>Cyanobacteria</b>                          | <i>Synechocystis pcc6803</i>      | 157                          | 311                         | 263                            | Jaiswal         | Inparanoid      |                          |                 |            |

**Supplementary Table S2.**

A list of updates in Plant Reactome knowledgebase (Gramene release #52-61)

| Gramene release #        | Pathway curation and projection        |                                                                                                                                                                                                                                                                           |                                                        | Website, tools and coding update                                                                                                                                                                                                                                                                  |
|--------------------------|----------------------------------------|---------------------------------------------------------------------------------------------------------------------------------------------------------------------------------------------------------------------------------------------------------------------------|--------------------------------------------------------|---------------------------------------------------------------------------------------------------------------------------------------------------------------------------------------------------------------------------------------------------------------------------------------------------|
| #52<br>(November, 2016)  | Metabolism, regulation, and transport  | Auxin transport<br>-Intracellular auxin transport<br>-Circadian Rhythm<br>-Tryptophan biosynthesis                                                                                                                                                                        | Polar auxin transport                                  |                                                                                                                                                                                                                                                                                                   |
|                          | Growth and Development                 | Inflorescence development<br>-Long day regulated expression of florigens<br>-Short day regulated expression of florigens<br>-Transition from vegetative to reproductive shoot apical meristem                                                                             | -                                                      |                                                                                                                                                                                                                                                                                                   |
|                          | Response to biotic and abiotic stimuli | Response to stress<br>-Response to cold temperature                                                                                                                                                                                                                       | -                                                      |                                                                                                                                                                                                                                                                                                   |
|                          | New species                            | <i>Beta vulgaris</i> , <i>Brassica napus</i> , <i>Syncechocystis pcc6803</i> , and <i>Trifolium pratense</i> (total 66 species).                                                                                                                                          |                                                        |                                                                                                                                                                                                                                                                                                   |
| #55<br>(September, 2017) | Metabolism and regulation              | -                                                                                                                                                                                                                                                                         | -                                                      | -Several new data files made available for download that articulate the relationships between gene products, pathways, and reactions, and external reference sources such as ChEBI, Ensembl, NCBI, and UniProt.<br>-Plant Reactome pathway data re-indexed and made available via Gramene search. |
|                          | Growth and Development                 | -                                                                                                                                                                                                                                                                         | -                                                      |                                                                                                                                                                                                                                                                                                   |
|                          | Response to biotic and abiotic stimuli | -                                                                                                                                                                                                                                                                         | -                                                      |                                                                                                                                                                                                                                                                                                   |
|                          | New species                            | No new species added (total species 66)                                                                                                                                                                                                                                   |                                                        |                                                                                                                                                                                                                                                                                                   |
| #56B (Feb, 2018)         | Metabolism and regulation              | -Photorespiration<br>-Ureide biosynthesis<br>-Beta-alanine betaine biosynthesis<br>-Proline biosynthesis V from arginine<br>-Phospholipid biosynthesis I<br>-Sphingolipid metabolism<br>-Mugineic acid biosynthesis<br>-Iron uptake and transport in root vascular system | -Cardiolipin biosynthesis<br>-Ent-kaurene biosynthesis | Plant Reactome pathway data re-indexed and made available via Gramene search.                                                                                                                                                                                                                     |

|                    |                                        |                                                                                                                                                                                                                                                                                                                                                                            |   |                                                                                                                                                                                                                                                                                                                                                                                                       |
|--------------------|----------------------------------------|----------------------------------------------------------------------------------------------------------------------------------------------------------------------------------------------------------------------------------------------------------------------------------------------------------------------------------------------------------------------------|---|-------------------------------------------------------------------------------------------------------------------------------------------------------------------------------------------------------------------------------------------------------------------------------------------------------------------------------------------------------------------------------------------------------|
|                    |                                        | <ul style="list-style-type: none"> <li>-Proline degradation</li> <li>-Glutamate degradation</li> <li>-Phenylalanine degradation III</li> <li>-Lysine degradation II</li> <li>-Threonine degradation</li> <li>-Response to iron deficiency</li> </ul>                                                                                                                       |   |                                                                                                                                                                                                                                                                                                                                                                                                       |
|                    | Growth and Development                 | <ul style="list-style-type: none"> <li>Vegetative structure development</li> <li>Reproductive structure development</li> <li>-Anther and pollen Development</li> <li>-Primary root development</li> </ul>                                                                                                                                                                  |   |                                                                                                                                                                                                                                                                                                                                                                                                       |
|                    | Response to biotic and abiotic stimuli | <ul style="list-style-type: none"> <li>Response to submergence</li> <li>-Underwater shoot and internode elongation</li> <li>-Response to phosphate deficiency</li> </ul>                                                                                                                                                                                                   |   |                                                                                                                                                                                                                                                                                                                                                                                                       |
|                    | New species                            | <i>Cucumis sativus</i> , <i>Dioscorea rotundata</i> , <i>Helianthus annuus</i> , <i>Corchorus capsularis</i> , <i>Lupinus angustifolius</i> , <i>Nicotiana attenuata</i> , <i>Chondrus crispus</i> , and <i>Galdieria sulphuraria</i> (total 74 species).                                                                                                                  |   |                                                                                                                                                                                                                                                                                                                                                                                                       |
| #59(October, 2018) | Metabolism and regulation              | <ul style="list-style-type: none"> <li>-Tricin biosynthesis</li> <li>-Lycopene catabolism</li> <li>-Oryzalyde A biosynthesis</li> <li>-Abscisic acid homeostasis</li> <li>-Reactive oxygen species homeostasis</li> <li>-Generation of superoxide radicals</li> <li>-Removal of superoxide radicals</li> <li>-Valine degradation</li> <li>-Cysteine degradation</li> </ul> | - | <p>The Plant Reactome web site redesigned on the Joomla Content Management System.</p> <p>Interactome overlay feature improvement: users can filter gene-gene interaction data a confidence score.</p> <p>EBI-Intact and BAR interactome data made available using the PSICQUIC webservices.</p> <p>Some gene-gene interaction data integrated in Plant Reactome for <i>Arabidopsis thaliana</i>.</p> |
|                    | Growth and Development                 | <ul style="list-style-type: none"> <li>-Reproductive meristem phase change</li> <li>-Flower development</li> <li>-Floral bract development</li> <li>-Seed development</li> </ul>                                                                                                                                                                                           | - | <p>The latest Plant Reactome pathway data has been re-indexed and made available via Gramene search.</p>                                                                                                                                                                                                                                                                                              |

|                   |                                        |                                                                                                                                                                                 |                                                                                                                                 |                                                                                                                                                                           |
|-------------------|----------------------------------------|---------------------------------------------------------------------------------------------------------------------------------------------------------------------------------|---------------------------------------------------------------------------------------------------------------------------------|---------------------------------------------------------------------------------------------------------------------------------------------------------------------------|
|                   | Response to biotic and abiotic stimuli | -Recognition of fungal and bacterial pathogens and immunity response                                                                                                            | -                                                                                                                               |                                                                                                                                                                           |
|                   | New species                            | <i>Daucus carota</i> , <i>Vigna radiata</i> , <i>Vigna angularis</i> , and <i>Triticum dicoccoides</i> (total 78 species).                                                      |                                                                                                                                 |                                                                                                                                                                           |
| #60(Feb, 2019)    | Metabolism and regulation              |                                                                                                                                                                                 | Thiosulfate disproportionation III                                                                                              | Plant Reactome pathway data re-indexed and made available via Gramene search                                                                                              |
|                   | Growth and Development                 | -Regulation of embryo development<br>-Maternal tissue PCD<br>-Cell cycle regulation<br>-Aleurone layer formation<br>-Regulation of seed size<br>-Regulation of leaf development | Flower development                                                                                                              |                                                                                                                                                                           |
|                   | Response to biotic and abiotic stimuli | -Arsenic uptake and detoxification<br>-HSFA7/HSFA6B transcription network induced by drought and ABA<br>-SNAC1 transcription network involved in drought and salinity tolerance |                                                                                                                                 |                                                                                                                                                                           |
|                   | New species                            | <i>Arabidopsis halleri</i> (total 79 species).                                                                                                                                  |                                                                                                                                 |                                                                                                                                                                           |
| #61 (April, 2019) | Metabolism and regulation              | Phytic acid biosynthesis (lipid independent)                                                                                                                                    | -                                                                                                                               | SSL (Secure Sockets Layer) has now been implemented on Plant Reactome.<br><br>Plant Reactome pathway data has also been re-indexed and made available via Gramene search. |
|                   | Growth and Development                 | Development of Root hair                                                                                                                                                        | -                                                                                                                               |                                                                                                                                                                           |
|                   | Response to biotic and abiotic stimuli | -Response to aluminum stress<br>-Root-specific gene-network of -NAC10_TF induced by drought, salinity, and ABA                                                                  | -SNAC1 transcription network involved in drought and salinity tolerance<br>-HSFA7-regulatory network induced by drought and ABA |                                                                                                                                                                           |
|                   | New species                            | <i>Actinidia chinensis</i> (kiwi fruit), <i>Panicum hallii</i> <i>FIL2</i> ("Hall's panicgrass"), and <i>Panicum hallii</i> <i>var. hallii</i> <i>HAL2</i> (total 82 species).  |                                                                                                                                 |                                                                                                                                                                           |

**Supplementary Table S3:**

A list of interactors retrieved from Plant Interactome datasets for genes involved in methylerythritol pathway (MEP). A few interactors discussed in the text are highlighted in yellow color.

| ID A      | ID B      | SCORE | #EVIDENCES |
|-----------|-----------|-------|------------|
| AT2G26930 | AT2G35390 | 0.63  | 1          |
| AT2G26930 | AT2G44530 | 0.63  | 1          |
| AT2G26930 | AT5G66860 | 0.63  | 1          |
| AT2G26930 | AT4G23620 | 0.63  | 1          |
| AT2G26930 | AT1G32380 | 0.63  | 1          |
| AT2G26930 | AT1G10700 | 0.62  | 1          |
| AT2G26930 | AT1G18440 | 0.62  | 1          |
| AT2G26930 | AT5G19830 | 0.62  | 1          |
| AT2G26930 | AT2G42910 | 0.62  | 1          |
| AT2G26930 | AT5G38290 | 0.62  | 1          |
| AT2G26930 | AT1G30580 | 0.6   | 1          |
| AT2G26930 | AT1G09940 | 0.59  | 1          |
| AT2G26930 | AT5G14470 | 0.59  | 1          |
| AT2G26930 | AT2G38700 | 0.59  | 1          |
| AT2G26930 | AT3G01640 | 0.59  | 1          |
| AT2G26930 | AT3G54250 | 0.59  | 1          |
| AT2G26930 | AT1G56050 | 0.59  | 1          |
| AT2G26930 | AT1G58290 | 0.58  | 1          |
| AT2G26930 | AT4G16130 | 0.58  | 1          |
| AT2G26930 | AT3G42850 | 0.58  | 1          |
| AT2G26930 | AT1G01220 | 0.58  | 1          |
| AT2G26930 | AT2G31250 | 0.58  | 1          |
| AT2G26930 | AT2G17265 | 0.58  | 1          |
| AT2G26930 | AT3G06580 | 0.58  | 1          |
| AT2G26930 | AT2G47420 | 0.58  | 1          |
| AT2G26930 | AT2G47020 | 0.58  | 1          |
| AT2G26930 | AT1G31910 | 0.58  | 1          |
| AT2G26930 | AT5G66360 | 0.57  | 1          |
| AT2G26930 | AT5G27450 | 0.57  | 1          |
| AT2G26930 | AT1G33330 | 0.57  | 1          |
| AT2G26930 | AT3G62910 | 0.55  | 1          |
| AT2G26930 | AT1G01860 | 0.54  | 1          |
| AT2G26930 | AT3G55400 | 0.4   | 1          |
| AT2G26930 | AT3G02060 | 0.37  | 1          |
| AT2G26930 | AT2G02500 | 0.34  | 1          |
| AT2G26930 | AT1G63680 | 0.34  | 1          |

|           |           |      |   |
|-----------|-----------|------|---|
| AT2G26930 | AT5G64150 | 0.33 | 1 |
| AT2G26930 | AT5G22800 | 0.32 | 1 |
| AT2G26930 | AT5G64580 | 0.31 | 1 |
| AT2G26930 | AT2G27760 | 0.28 | 1 |
| AT2G26930 | AT3G18880 | 0.25 | 1 |
| AT2G26930 | AT1G49400 | 0.24 | 1 |
| AT2G26930 | AT2G43030 | 0.24 | 1 |
| AT2G02500 | AT1G63970 | 0.63 | 1 |
| AT2G02500 | AT3G04820 | 0.61 | 1 |
| AT2G02500 | AT3G48330 | 0.58 | 1 |
| AT2G02500 | AT4G14930 | 0.58 | 1 |
| AT2G02500 | AT5G50240 | 0.58 | 1 |
| AT2G02500 | AT1G72880 | 0.56 | 1 |
| AT2G02500 | AT4G02120 | 0.54 | 1 |
| AT2G02500 | AT2G29560 | 0.53 | 1 |
| AT2G02500 | AT2G34890 | 0.52 | 1 |
| AT2G02500 | AT1G30820 | 0.51 | 1 |
| AT2G02500 | AT4G20320 | 0.48 | 1 |
| AT2G02500 | AT2G36530 | 0.48 | 1 |
| AT2G02500 | AT3G12670 | 0.47 | 1 |
| AT2G02500 | AT5G50340 | 0.45 | 1 |
| AT2G02500 | AT1G74030 | 0.45 | 1 |
| AT2G02500 | AT3G28860 | 0.44 | 1 |
| AT2G02500 | AT1G55140 | 0.44 | 1 |
| AT2G02500 | AT2G31170 | 0.44 | 1 |
| AT2G02500 | AT4G12060 | 0.44 | 1 |
| AT2G02500 | AT3G13740 | 0.44 | 1 |
| AT2G02500 | AT3G54690 | 0.44 | 1 |
| AT2G02500 | AT4G25370 | 0.43 | 1 |
| AT2G02500 | AT2G19870 | 0.43 | 1 |
| AT2G02500 | AT1G26920 | 0.4  | 1 |
| AT2G02500 | AT3G45450 | 0.4  | 1 |
| AT2G02500 | AT5G50920 | 0.39 | 1 |
| AT2G02500 | AT5G38830 | 0.38 | 1 |
| AT2G02500 | AT3G48870 | 0.37 | 1 |
| AT2G02500 | AT1G16340 | 0.36 | 1 |
| AT2G02500 | AT1G79500 | 0.36 | 1 |
| AT2G02500 | AT3G02110 | 0.36 | 1 |
| AT2G02500 | AT2G14890 | 0.36 | 1 |
| AT2G02500 | AT2G45280 | 0.36 | 1 |
| AT2G02500 | AT5G56760 | 0.35 | 1 |
| AT2G02500 | AT3G56300 | 0.35 | 1 |
| AT2G02500 | AT2G26930 | 0.34 | 1 |
| AT2G02500 | AT1G55920 | 0.34 | 1 |



|           |           |      |   |
|-----------|-----------|------|---|
| AT2G02500 | AT5G51070 | 0.33 | 1 |
| AT2G02500 | AT4G18740 | 0.33 | 1 |
| AT2G02500 | AT4G35640 | 0.33 | 1 |
| AT2G02500 | AT5G14920 | 0.33 | 1 |
| AT2G02500 | AT3G13110 | 0.33 | 1 |
| AT2G02500 | AT2G17640 | 0.33 | 1 |
| AT2G02500 | AT5G60600 | 0.33 | 1 |
| AT2G02500 | AT3G57040 | 0.33 | 1 |
| AT2G02500 | AT5G12250 | 0.32 | 1 |
| AT2G02500 | AT4G24510 | 0.3  | 1 |
| AT2G02500 | AT5G16000 | 0.3  | 1 |
| AT2G02500 | AT5G48900 | 0.28 | 1 |
| AT2G02500 | AT5G62790 | 0.28 | 1 |
| AT2G02500 | AT3G18880 | 0.28 | 1 |
| AT2G02500 | AT1G67430 | 0.28 | 1 |
| AT2G02500 | AT1G27400 | 0.28 | 1 |
| AT2G02500 | AT2G05790 | 0.27 | 1 |
| AT2G02500 | AT4G34350 | 0.26 | 1 |
| AT2G02500 | AT4G34730 | 0.26 | 1 |
| AT2G02500 | AT1G52190 | 0.25 | 1 |
| AT2G02500 | AT3G20230 | 0.24 | 1 |
| AT2G02500 | AT1G22740 | 0.23 | 1 |
| AT2G02500 | AT3G19820 | 0.23 | 1 |
| AT2G02500 | AT1G65010 | 0.23 | 1 |
| AT2G02500 | AT2G24020 | 0.23 | 1 |
| AT2G02500 | AT5G11420 | 0.23 | 1 |
| AT2G02500 | AT2G45850 | 0.21 | 1 |
| AT2G02500 | AT1G58440 | 0.21 | 1 |
| AT2G02500 | AT3G24800 | 0.21 | 1 |
| AT2G02500 | AT3G49260 | 0.21 | 1 |
| AT5G62790 | AT3G63190 | 0.63 | 1 |
| AT5G62790 | AT5G58780 | 0.63 | 1 |
| AT5G62790 | AT2G45150 | 0.63 | 1 |
| AT5G62790 | AT5G58782 | 0.63 | 1 |
| AT5G62790 | AT5G58784 | 0.63 | 1 |
| AT5G62790 | AT2G32480 | 0.63 | 1 |
| AT5G62790 | AT5G60500 | 0.63 | 1 |
| AT5G62790 | AT5G58770 | 0.63 | 1 |
| AT5G62790 | AT1G62430 | 0.63 | 1 |
| AT5G62790 | AT3G18680 | 0.63 | 1 |
| AT5G62790 | AT2G23400 | 0.63 | 1 |
| AT5G62790 | AT3G10030 | 0.63 | 1 |
| AT5G62790 | AT2G23410 | 0.63 | 1 |
| AT5G62790 | AT4G22340 | 0.63 | 1 |

|           |           |      |   |
|-----------|-----------|------|---|
| AT5G62790 | AT4G26770 | 0.63 | 1 |
| AT5G62790 | AT4G11120 | 0.63 | 1 |
| AT5G62790 | AT5G60510 | 0.63 | 1 |
| AT5G62790 | AT3G60620 | 0.63 | 1 |
| AT5G62790 | AT3G01800 | 0.63 | 1 |
| AT5G62790 | AT2G17570 | 0.63 | 1 |
| AT5G62790 | AT1G05140 | 0.63 | 1 |
| AT5G62790 | AT5G10160 | 0.62 | 1 |
| AT5G62790 | AT4G29060 | 0.62 | 1 |
| AT5G62790 | AT5G05520 | 0.62 | 1 |
| AT5G62790 | AT4G29540 | 0.62 | 1 |
| AT5G62790 | AT2G04560 | 0.62 | 1 |
| AT5G62790 | ATCG00160 | 0.62 | 1 |
| AT5G62790 | AT3G03600 | 0.62 | 1 |
| AT5G62790 | AT2G22230 | 0.62 | 1 |
| AT5G62790 | AT4G05210 | 0.61 | 1 |
| AT5G62790 | AT4G21220 | 0.61 | 1 |
| AT5G62790 | AT3G11070 | 0.6  | 1 |
| AT5G62790 | AT3G25740 | 0.6  | 1 |
| AT5G62790 | AT1G13270 | 0.6  | 1 |
| AT5G62790 | AT2G25100 | 0.6  | 1 |
| AT5G62790 | AT2G45240 | 0.6  | 1 |
| AT5G62790 | AT4G37040 | 0.59 | 1 |
| AT5G62790 | AT1G72370 | 0.59 | 1 |
| AT5G62790 | AT4G22780 | 0.57 | 1 |
| AT5G62790 | AT5G10880 | 0.54 | 1 |
| AT5G62790 | AT3G01990 | 0.53 | 1 |
| AT5G62790 | AT2G03730 | 0.51 | 1 |
| AT5G62790 | AT1G69040 | 0.46 | 1 |
| AT5G62790 | AT5G57950 | 0.45 | 1 |
| AT5G62790 | AT1G21500 | 0.45 | 1 |
| AT5G62790 | AT5G04740 | 0.42 | 1 |
| AT5G62790 | AT3G02730 | 0.42 | 1 |
| AT5G62790 | AT1G33040 | 0.41 | 1 |
| AT5G62790 | AT5G19940 | 0.4  | 1 |
| AT5G62790 | AT2G38040 | 0.4  | 1 |
| AT5G62790 | AT5G53580 | 0.39 | 1 |
| AT5G62790 | AT3G16250 | 0.38 | 1 |
| AT5G62790 | AT3G46740 | 0.38 | 1 |
| AT5G62790 | AT3G18390 | 0.38 | 1 |
| AT5G62790 | AT1G63970 | 0.38 | 1 |
| AT5G62790 | AT1G76825 | 0.37 | 1 |
| AT5G62790 | AT4G09650 | 0.37 | 1 |
| AT5G62790 | AT4G18370 | 0.37 | 1 |

|           |           |      |   |
|-----------|-----------|------|---|
| AT5G62790 | AT3G51800 | 0.36 | 1 |
| AT5G62790 | AT5G63420 | 0.36 | 1 |
| AT5G62790 | AT3G57150 | 0.36 | 1 |
| AT5G62790 | AT3G62120 | 0.36 | 1 |
| AT5G62790 | AT5G19620 | 0.36 | 1 |
| AT5G62790 | AT1G12420 | 0.35 | 1 |
| AT5G62790 | AT4G31850 | 0.35 | 1 |
| AT5G62790 | AT1G12800 | 0.35 | 1 |
| AT5G62790 | AT1G12900 | 0.34 | 1 |
| AT5G62790 | AT5G08340 | 0.33 | 1 |
| AT5G62790 | AT5G23330 | 0.33 | 1 |
| AT5G62790 | AT1G76720 | 0.32 | 1 |
| AT5G62790 | AT3G12290 | 0.32 | 1 |
| AT5G62790 | AT1G33810 | 0.32 | 1 |
| AT5G62790 | AT5G52520 | 0.32 | 1 |
| AT5G62790 | AT3G51510 | 0.32 | 1 |
| AT5G62790 | AT2G21385 | 0.32 | 1 |
| AT5G62790 | AT4G37510 | 0.31 | 1 |
| AT5G62790 | AT2G04400 | 0.31 | 1 |
| AT5G62790 | AT1G76810 | 0.31 | 1 |
| AT5G62790 | AT3G52750 | 0.31 | 1 |
| AT5G62790 | AT5G14260 | 0.31 | 1 |
| AT5G62790 | AT3G27850 | 0.3  | 1 |
| AT5G62790 | AT3G09210 | 0.3  | 1 |
| AT5G62790 | AT3G27830 | 0.3  | 1 |
| AT5G62790 | AT5G58330 | 0.3  | 1 |
| AT5G62790 | AT1G03630 | 0.3  | 1 |
| AT5G62790 | AT2G42220 | 0.29 | 1 |
| AT5G62790 | AT5G53860 | 0.29 | 1 |
| AT5G62790 | AT2G31350 | 0.29 | 1 |
| AT5G62790 | AT3G47460 | 0.29 | 1 |
| AT5G62790 | AT2G02500 | 0.28 | 1 |
| AT5G62790 | AT3G12080 | 0.28 | 1 |
| AT5G62790 | AT5G48220 | 0.28 | 1 |
| AT5G62790 | AT2G28605 | 0.28 | 1 |
| AT5G62790 | AT2G01350 | 0.28 | 1 |
| AT5G62790 | AT4G35250 | 0.28 | 1 |
| AT5G62790 | AT4G18270 | 0.28 | 1 |
| AT5G62790 | AT1G19150 | 0.28 | 1 |
| AT5G62790 | AT1G49530 | 0.27 | 1 |
| AT5G62790 | AT2G23800 | 0.27 | 1 |
| AT5G62790 | AT1G03310 | 0.27 | 1 |
| AT5G62790 | AT1G02150 | 0.27 | 1 |
| AT5G62790 | AT2G34630 | 0.27 | 1 |

|           |           |      |   |
|-----------|-----------|------|---|
| AT5G62790 | AT1G31180 | 0.26 | 1 |
| AT5G62790 | AT5G14200 | 0.26 | 1 |
| AT5G62790 | AT1G80560 | 0.26 | 1 |
| AT5G62790 | AT4G26860 | 0.25 | 1 |
| AT5G62790 | AT5G07020 | 0.25 | 1 |
| AT5G62790 | AT1G75200 | 0.25 | 1 |
| AT5G62790 | AT2G37270 | 0.25 | 1 |
| AT5G62790 | AT3G22425 | 0.25 | 1 |
| AT5G62790 | AT4G04640 | 0.25 | 1 |
| AT5G62790 | AT2G39590 | 0.25 | 1 |
| AT5G62790 | AT5G66120 | 0.25 | 1 |
| AT5G62790 | AT1G06130 | 0.25 | 1 |
| AT5G62790 | AT3G11940 | 0.24 | 1 |
| AT5G62790 | AT4G39120 | 0.24 | 1 |
| AT5G62790 | AT1G09830 | 0.24 | 1 |
| AT5G62790 | AT3G19490 | 0.24 | 1 |
| AT5G62790 | AT2G18710 | 0.24 | 1 |
| AT5G62790 | AT3G46040 | 0.24 | 1 |
| AT5G62790 | AT1G50200 | 0.24 | 1 |
| AT5G62790 | AT4G14910 | 0.24 | 1 |
| AT5G62790 | AT1G07770 | 0.23 | 1 |
| AT5G62790 | AT4G25080 | 0.23 | 1 |
| AT5G62790 | AT2G05830 | 0.23 | 1 |
| AT5G62790 | AT5G59850 | 0.23 | 1 |
| AT5G62790 | AT1G70760 | 0.22 | 1 |
| AT5G62790 | AT1G48420 | 0.22 | 1 |
| AT5G62790 | AT5G52970 | 0.21 | 1 |
| AT5G62790 | AT1G20020 | 0.2  | 1 |
| AT5G60600 | AT3G19630 | 0.62 | 1 |
| AT5G60600 | AT2G39670 | 0.6  | 1 |
| AT5G60600 | AT1G60230 | 0.6  | 1 |
| AT5G60600 | AT1G17410 | 0.58 | 1 |
| AT5G60600 | AT5G39960 | 0.56 | 1 |
| AT5G60600 | AT5G63310 | 0.54 | 1 |
| AT5G60600 | AT3G02760 | 0.52 | 1 |
| AT5G60600 | AT5G03406 | 0.5  | 1 |
| AT5G60600 | AT3G18680 | 0.49 | 1 |
| AT5G60600 | AT5G45160 | 0.49 | 1 |
| AT5G60600 | AT4G23900 | 0.47 | 1 |
| AT5G60600 | AT3G10030 | 0.47 | 1 |
| AT5G60600 | AT3G63190 | 0.46 | 1 |
| AT5G60600 | AT4G11010 | 0.46 | 1 |
| AT5G60600 | AT5G65720 | 0.44 | 1 |
| AT5G60600 | AT3G03600 | 0.41 | 1 |

|           |           |      |   |
|-----------|-----------|------|---|
| AT5G60600 | AT3G01800 | 0.41 | 1 |
| AT5G60600 | AT4G22340 | 0.4  | 1 |
| AT5G60600 | AT1G76825 | 0.39 | 1 |
| AT5G60600 | AT5G10880 | 0.39 | 1 |
| AT5G60600 | AT1G76720 | 0.37 | 1 |
| AT5G60600 | AT1G62430 | 0.37 | 1 |
| AT5G60600 | AT1G79470 | 0.36 | 1 |
| AT5G60600 | AT5G39620 | 0.36 | 1 |
| AT5G60600 | AT5G52520 | 0.35 | 1 |
| AT5G60600 | ATCG00160 | 0.35 | 1 |
| AT5G60600 | AT2G25210 | 0.34 | 1 |
| AT5G60600 | AT1G16350 | 0.34 | 1 |
| AT5G60600 | AT5G60510 | 0.34 | 1 |
| AT5G60600 | AT5G08340 | 0.34 | 1 |
| AT5G60600 | AT2G17570 | 0.34 | 1 |
| AT5G60600 | AT5G23330 | 0.34 | 1 |
| AT5G60600 | AT1G44910 | 0.33 | 1 |
| AT5G60600 | AT2G02500 | 0.33 | 1 |
| AT5G60600 | AT5G60500 | 0.33 | 1 |
| AT5G60600 | AT4G05050 | 0.33 | 1 |
| AT5G60600 | AT5G11560 | 0.33 | 1 |
| AT5G60600 | AT1G21160 | 0.33 | 1 |
| AT5G60600 | AT4G29060 | 0.32 | 1 |
| AT5G60600 | AT4G34350 | 0.32 | 1 |
| AT5G60600 | AT1G07140 | 0.32 | 1 |
| AT5G60600 | AT5G19940 | 0.32 | 1 |
| AT5G60600 | AT1G78620 | 0.31 | 1 |
| AT5G60600 | AT3G63490 | 0.31 | 1 |
| AT5G60600 | AT3G46100 | 0.31 | 1 |
| AT5G60600 | AT5G61410 | 0.31 | 1 |
| AT5G60600 | AT1G76810 | 0.31 | 1 |
| AT5G60600 | AT2G36880 | 0.31 | 1 |
| AT5G60600 | AT4G26770 | 0.31 | 1 |
| AT5G60600 | AT3G60620 | 0.31 | 1 |
| AT5G60600 | AT5G14460 | 0.31 | 1 |
| AT5G60600 | AT1G80620 | 0.3  | 1 |
| AT5G60600 | AT5G21020 | 0.3  | 1 |
| AT5G60600 | AT3G52580 | 0.29 | 1 |
| AT5G60600 | AT3G44620 | 0.29 | 1 |
| AT5G60600 | AT4G24190 | 0.29 | 1 |
| AT5G60600 | AT3G47220 | 0.29 | 1 |
| AT5G60600 | AT2G36160 | 0.28 | 1 |
| AT5G60600 | AT3G11510 | 0.28 | 1 |
| AT5G60600 | AT3G09680 | 0.28 | 1 |

|           |           |      |   |
|-----------|-----------|------|---|
| AT5G60600 | AT2G31810 | 0.28 | 1 |
| AT5G60600 | AT4G25370 | 0.27 | 1 |
| AT5G60600 | AT3G11940 | 0.27 | 1 |
| AT5G60600 | AT1G61580 | 0.27 | 1 |
| AT5G60600 | ATCG00650 | 0.27 | 1 |
| AT5G60600 | AT2G39590 | 0.27 | 1 |
| AT5G60600 | AT5G03850 | 0.27 | 1 |
| AT5G60600 | AT3G54210 | 0.27 | 1 |
| AT5G60600 | AT2G33450 | 0.26 | 1 |
| AT5G60600 | AT1G30230 | 0.26 | 1 |
| AT5G60600 | AT2G01110 | 0.26 | 1 |
| AT5G60600 | AT1G43170 | 0.26 | 1 |
| AT5G60600 | AT5G13630 | 0.26 | 1 |
| AT5G60600 | AT2G38540 | 0.26 | 1 |
| AT5G60600 | AT3G46040 | 0.26 | 1 |
| AT5G60600 | AT5G04590 | 0.26 | 1 |
| AT5G60600 | AT1G71500 | 0.26 | 1 |
| AT5G60600 | AT4G40040 | 0.26 | 1 |
| AT5G60600 | AT1G34360 | 0.26 | 1 |
| AT5G60600 | AT5G28750 | 0.25 | 1 |
| AT5G60600 | AT1G07770 | 0.25 | 1 |
| AT5G60600 | AT2G44050 | 0.25 | 1 |
| AT5G60600 | AT3G27850 | 0.25 | 1 |
| AT5G60600 | AT1G08830 | 0.25 | 1 |
| AT5G60600 | AT5G02960 | 0.25 | 1 |
| AT5G60600 | AT5G59850 | 0.25 | 1 |
| AT5G60600 | AT4G29430 | 0.25 | 1 |
| AT5G60600 | AT3G61620 | 0.25 | 1 |
| AT5G60600 | AT3G27830 | 0.25 | 1 |
| AT5G60600 | AT1G72550 | 0.25 | 1 |
| AT5G60600 | ATCG00170 | 0.25 | 1 |
| AT5G60600 | AT4G02890 | 0.25 | 1 |
| AT5G60600 | AT4G18730 | 0.24 | 1 |
| AT5G60600 | AT1G49380 | 0.24 | 1 |
| AT5G60600 | AT2G34250 | 0.24 | 1 |
| AT5G60600 | AT2G42740 | 0.24 | 1 |
| AT5G60600 | AT3G16140 | 0.24 | 1 |
| AT5G60600 | AT5G09510 | 0.24 | 1 |
| AT5G60600 | AT1G67430 | 0.24 | 1 |
| AT5G60600 | AT1G33120 | 0.24 | 1 |
| AT5G60600 | AT1G27400 | 0.24 | 1 |
| AT5G60600 | AT1G05180 | 0.24 | 1 |
| AT5G60600 | AT1G33140 | 0.24 | 1 |
| AT5G60600 | AT5G39850 | 0.24 | 1 |

|           |           |      |   |
|-----------|-----------|------|---|
| AT5G60600 | AT1G31817 | 0.24 | 1 |
| AT5G60600 | AT5G24400 | 0.24 | 1 |
| AT5G60600 | AT5G64150 | 0.24 | 1 |
| AT5G60600 | AT5G24490 | 0.24 | 1 |
| AT5G60600 | AT3G18490 | 0.24 | 1 |
| AT5G60600 | AT1G01290 | 0.24 | 1 |
| AT5G60600 | AT3G58700 | 0.24 | 1 |
| AT5G60600 | AT3G10920 | 0.24 | 1 |
| AT5G60600 | ATCG01040 | 0.23 | 1 |
| AT5G60600 | AT2G21580 | 0.23 | 1 |
| AT5G60600 | AT5G49930 | 0.23 | 1 |
| AT5G60600 | AT4G34450 | 0.23 | 1 |
| AT5G60600 | AT5G64400 | 0.23 | 1 |
| AT5G60600 | AT3G26900 | 0.23 | 1 |
| AT5G60600 | AT1G23290 | 0.23 | 1 |
| AT5G60600 | AT4G37670 | 0.23 | 1 |
| AT5G60600 | AT1G29070 | 0.23 | 1 |
| AT5G60600 | AT1G22630 | 0.22 | 1 |
| AT5G60600 | AT2G06520 | 0.22 | 1 |
| AT5G60600 | AT1G66200 | 0.22 | 1 |
| AT5G60600 | AT4G33865 | 0.22 | 1 |
| AT5G60600 | AT4G21860 | 0.22 | 1 |
| AT5G60600 | AT4G35450 | 0.21 | 1 |
| AT5G60600 | AT2G46820 | 0.21 | 1 |
| AT5G60600 | AT4G24770 | 0.21 | 1 |
| AT5G60600 | AT4G29350 | 0.21 | 1 |
| AT5G60600 | AT4G14880 | 0.21 | 1 |
| AT5G60600 | AT1G04270 | 0.2  | 1 |
| AT5G60600 | AT5G59613 | 0.2  | 1 |
| AT5G60600 | AT4G17390 | 0.2  | 1 |
| AT4G34350 | AT5G49030 | 0.61 | 1 |
| AT4G34350 | AT5G08340 | 0.59 | 1 |
| AT4G34350 | AT5G23330 | 0.59 | 1 |
| AT4G34350 | AT1G05140 | 0.43 | 1 |
| AT4G34350 | AT2G32480 | 0.41 | 1 |
| AT4G34350 | AT1G78620 | 0.4  | 1 |
| AT4G34350 | AT1G78970 | 0.38 | 1 |
| AT4G34350 | AT1G66960 | 0.36 | 1 |
| AT4G34350 | AT1G78950 | 0.36 | 1 |
| AT4G34350 | AT1G78955 | 0.36 | 1 |
| AT4G34350 | AT5G42600 | 0.33 | 1 |
| AT4G34350 | AT1G78500 | 0.33 | 1 |
| AT4G34350 | AT5G48010 | 0.33 | 1 |
| AT4G34350 | AT5G36150 | 0.33 | 1 |

|           |           |      |   |
|-----------|-----------|------|---|
| AT4G34350 | AT3G45130 | 0.33 | 1 |
| AT4G34350 | AT4G15340 | 0.32 | 1 |
| AT4G34350 | AT2G07050 | 0.32 | 1 |
| AT4G34350 | AT1G78960 | 0.32 | 1 |
| AT4G34350 | AT4G15370 | 0.32 | 1 |
| AT4G34350 | AT5G60600 | 0.32 | 1 |
| AT4G34350 | AT3G24590 | 0.3  | 1 |
| AT4G34350 | AT3G56490 | 0.29 | 1 |
| AT4G34350 | AT2G01110 | 0.28 | 1 |
| AT4G34350 | AT2G33450 | 0.27 | 1 |
| AT4G34350 | AT2G19720 | 0.27 | 1 |
| AT4G34350 | AT5G19930 | 0.27 | 1 |
| AT4G34350 | AT4G24190 | 0.27 | 1 |
| AT4G34350 | AT5G24490 | 0.27 | 1 |
| AT4G34350 | AT5G19620 | 0.27 | 1 |
| AT4G34350 | AT1G72370 | 0.27 | 1 |
| AT4G34350 | AT2G02500 | 0.26 | 1 |
| AT4G34350 | AT3G10060 | 0.26 | 1 |
| AT4G34350 | AT5G52520 | 0.26 | 1 |
| AT4G34350 | AT5G64150 | 0.26 | 1 |
| AT4G34350 | AT4G29430 | 0.26 | 1 |
| AT4G34350 | AT2G24020 | 0.26 | 1 |
| AT4G34350 | AT3G09680 | 0.25 | 1 |
| AT4G34350 | AT3G21580 | 0.25 | 1 |
| AT4G34350 | AT1G31160 | 0.25 | 1 |
| AT4G34350 | AT1G07770 | 0.25 | 1 |
| AT4G34350 | AT5G13420 | 0.25 | 1 |
| AT4G34350 | AT1G49380 | 0.25 | 1 |
| AT4G34350 | AT3G04770 | 0.25 | 1 |
| AT4G34350 | AT5G02120 | 0.25 | 1 |
| AT4G34350 | AT5G59850 | 0.25 | 1 |
| AT4G34350 | AT4G30620 | 0.25 | 1 |
| AT4G34350 | AT5G44520 | 0.25 | 1 |
| AT4G34350 | AT4G34730 | 0.25 | 1 |
| AT4G34350 | AT3G60370 | 0.25 | 1 |
| AT4G34350 | AT5G10880 | 0.24 | 1 |
| AT4G34350 | ATCG01090 | 0.24 | 1 |
| AT4G34350 | ATCG01060 | 0.24 | 1 |
| AT4G34350 | AT1G67430 | 0.24 | 1 |
| AT4G34350 | AT1G76490 | 0.24 | 1 |
| AT4G34350 | ATCG00660 | 0.24 | 1 |
| AT4G34350 | ATCG00140 | 0.24 | 1 |
| AT4G34350 | AT1G27400 | 0.24 | 1 |
| AT4G34350 | AT4G31050 | 0.23 | 1 |



|           |           |      |   |
|-----------|-----------|------|---|
| AT4G34350 | AT2G39590 | 0.23 | 1 |
| AT4G34350 | AT1G53120 | 0.23 | 1 |
| AT4G34350 | AT2G43030 | 0.23 | 1 |
| AT4G34350 | AT5G23120 | 0.23 | 1 |
| AT4G34350 | AT1G43170 | 0.23 | 1 |
| AT4G34350 | AT1G19740 | 0.23 | 1 |
| AT4G34350 | AT5G01970 | 0.22 | 1 |
| AT4G34350 | AT5G02580 | 0.22 | 1 |
| AT4G34350 | AT5G40890 | 0.22 | 1 |
| AT4G34350 | AT4G04640 | 0.21 | 1 |

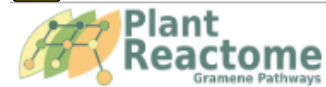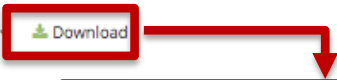

Find Reactions, Proteins and Pathways

e.g. YUC4, cytokinin, jasmonic **Go!**

Downloads

Plant Reactome subscribes to the principles of [open source](#) and [open data](#). We have continuously supported the major open-data standards, including [BioPAX](#), [PSI-MITAB](#), [SBML](#), and [SBGN](#) export formats. The Plant Reactome data and source code continues to be publicly accessible under the terms of a [Creative Commons Attribution 3.0 Unported License](#).

The Plant Reactome GitHub repository is accessible [here](#).

Access to our most recent data release can be found below.

Identifier mapping files:

Mapping files link the source database identifier to the lowest level pathway diagram or subset of the pathway:

- [UniProt to pathways](#)
- [ChEBI to pathways](#)
- [ENSEMBL to pathways](#)
- [NCBI to pathways](#)
- [mIRBase to pathways](#)

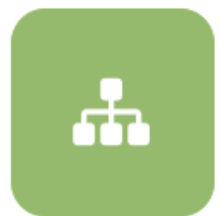

Pathway Browser

Visualize and interact with Plant Reactome biological pathways

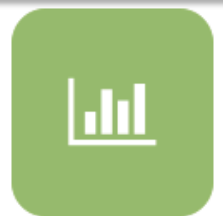

Analyze Data

Species comparison, OMICS data analyses, pathway mapping, gene interaction

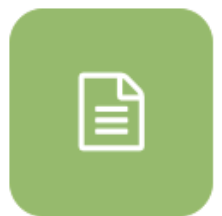

Documentation

Information to browse the database and use its principal tools for data analysis.

USE REACTOME GRAPH DATABASE IN YOUR PROJECT

Why Plant Reactome

Tweets

Analysis tools

Your data Options Analysis

Step 1: Select a file from your computer or paste your own data and click on the corresponding "Continue" button.

Select data file for analysis: **Choose File** No file **Upload data** Continue

Paste your data to analyse or try example data sets:

Paste your data here or select an example from the right >>

Some examples:

- Reference accession list (UniProt)
- Gene identifiers
- Small molecules (ChEBI)
- Small molecules (KEGG)
- Expression data (microarray)
- Metabolomics data

Paste data

Clear Continue

Compare pathways between reference species rice and your favorite species

Pathway enrichment analysis window

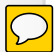

# Event hierarchy

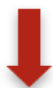

# Pathway diagram

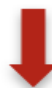

Pathways for: *Oryza sativa*

Event Hierarchy:

- Cellular processes
- Circadian rhythm
- Growth and developmental processes
  - Reproductive structure development
    - Reproductive meristem phase change
    - Flower development
      - Carpel development
      - Lodicule development
      - Ovule development
      - Stamen development
      - Floral bract development
      - Transcription of DL
      - Transcription of MADS8
      - Transcription of MADS7
      - Transcription of MADS17
      - Transcription of MADS34
      - Expression of MADS13
      - Expression of MADS2
      - Expression of MADS3
      - Expression of MADS4
      - Expression of MADS58
      - Expression of SPW1
      - Expression of MADS1
    - Inflorescence development
      - Long day regulated expression of florigens
      - Short day regulated expression of florigens
      - Transition from vegetative to reproductive shoot
    - Inflorescence development
    - Anther and pollen development
  - Seed development
    - Regulation of embryo development
      - Endosperm morphogenesis
        - Maternal tissue PCD
        - Cell cycle regulation
        - Aleurone layer formation
      - Regulatory network of nutrient accumulation
      - Regulation of seed size
    - Vegetative structure development
  - Metabolism and regulation
    - Generation of precursor metabolites and energy
    - Amino acid metabolism
    - Amine and polyamine biosynthesis

Pathway diagram showing MPK6 regulation across cytosol, nucleoplasm, and plastid stroma. Key components include ASB1, Roc1, TF1, PHT1;4, MPK6 gene, LFL1 gene, GD1, GA2OX3 gene, HAZ1 gene, OSH1 gene, GE gene, and various biosynthesis pathways like IAA, Phytoalexane, Momilactone, and Gibberellin.

Settings: Interactor Overlays. Existing resources: Plant Interactome, PSICQUIC, APID Interactomes, BAR, Bnf-ud, BIND, BindingDB. Custom Resources: Add a new resource. BAR

Links and summary

Regulation of embryo development | Id: R-OSA-9631623 | Species: *Oryza sativa*

Summation

In rice, early embryogenesis includes establishment of three axes, namely apical-basal, radial, and dorsal-ventral axes to further development as a globular embryo. Radial symmetry disappears when organ differentiation begins at specific regions in the globular embryo. Rice embryos complete all morphogenetic events within nine days under normal conditions (Ito et al., 2002; 2004). Hundreds of genes specifically express during different stages of embryo development but regulatory events during embryogenesis are not well known in rice. It is assumed that molecular mechanisms controlling the embryo pathway are probably conserved between monocot and dicot species, at least to some extent (Guo et al., 2013).

### Database Information

Node Labels

- (34538) AbstractModifiedResidue
- Affiliation BlackBoxEvent Book
- CandidateSet CatalystActivity
- Compartment Complex DBInfo
- DatabaseIdentifier
- DatabaseObject DefinedSet
- Disease EntityFunctionalStatus
- EntitySet
- EntityWithAccessionedSequence
- Event EvidenceType
- ExternalOntology Figure
- FunctionalStatus

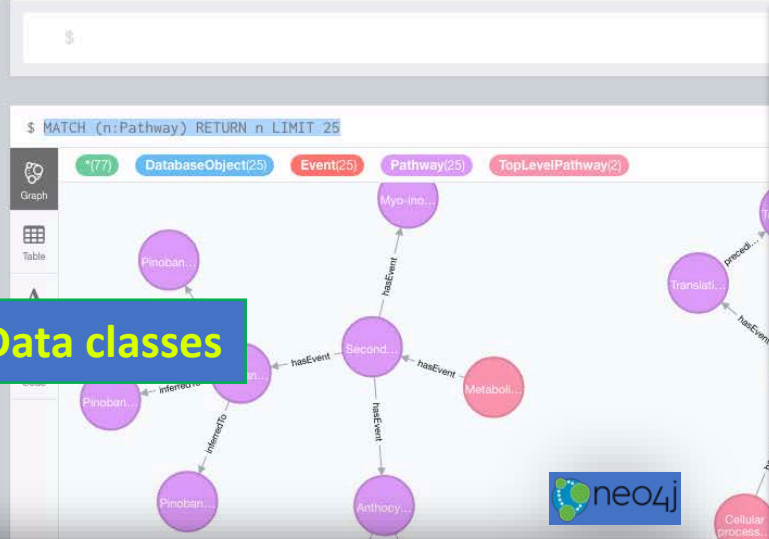

Page-20

```
$ MATCH (n:Pathway{isInferred:False}) RETURN n LIMIT 300
```

Graph Table Text Code

```
{
  "speciesName": "Oryza sativa",
  "isInDisease": false,
  "displayName": "Cellular processes",
  "stIdVersion": "R-OSA-2894886.1",
  "dbId": 2894886,
  "name": [
    "Cellular processes"
  ],
  "stId": "R-OSA-2894886",
  "simpleLabel": "TopLevelPathway",
  "hasDiagram": true,
  "isInferred": false
}
```

DatabaseObject(300) Event(300) Pathway(300) TopLevelPathway(6)

hasEvent(304) precedingEvent(10)

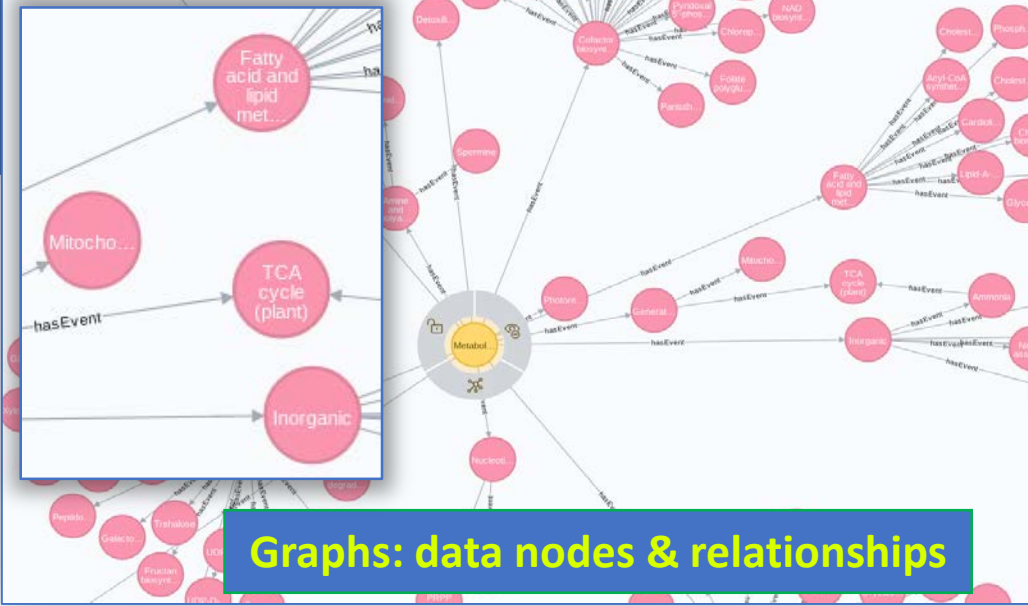

Graphs & results

```
$ MATCH (n:Pathway{isInferred:false}) RETURN n LIMIT 300
```

Graph Table Text Code

```
"n"
[{"speciesName":"Oryza sativa","isInDisease":false,"displayN
lar processes","stIdVersion":"R-OSA-2894886.1","dbId":28948
["Cellular processes"],"stId":"R-OSA-2894886","simpleLabel":
thway","hasDiagram":true,"isInferred":false}
[{"speciesName":"Oryza sativa","isInDisease":false,"displayN
cellular transport: COPII (Coat Protein 2) mediated vesicle
,"stIdVersion":"R-OSA-1112998.1","dbId":1112998,"name":["Tr
transport: COPII (Coat Protein 2) mediated vesicle transpo
:"R-OSA-1112998","simpleLabel":"Pathway","hasDiagram":true,
":false}
[{"speciesName":"Oryza sativa","isInDisease":false,"displayN
in metabolism: translation","stIdVersion":"R-OSA-2972871.1'
|2871","name":["Protein metabolism: translation","Protein syn
|tId":"R-OSA-2972871","simpleLabel":"Pathway","hasDiagram":t
|rred":false}
```

e.g. YUC4, cytokinin, jasmonic

Go!

Test queries

Methods

# Content Service <sup>1.0</sup>

RESTful service for Reactome content

**entities** Reactome Data: PhysicalEntity queries

**events** Reactome Data: Queries related to events

**exporter** Plant Reactome Data: Format Exporter

**interactors** Molecule interactors

**orthology** Reactome Data: Orthology related queries

**participants** Reactome Data: Queries related to participants

**pathways** Reactome Data: Pathway related queries

**person** Reactome Data: Person queries

Curl

```

curl -X GET https://plantreactome.gramene.org/ContentService/data/events/populus-trichocarpa -H "accept: application/json"
    
```

Service request

GET

/data/eventsHierarchy/{species} The

| Name                      | Description                                      |
|---------------------------|--------------------------------------------------|
| <b>species</b> * required | Allowed species filter: SpeciesName              |
| string<br>(path)          | <input type="text" value="Populus trichocarpa"/> |

Execute

Response body

JSON Response

```

[
  {
    "stId": "R-PTI-9030769",
    "name": "Growth and developmental",
    "species": "Populus trichocarpa",
    "type": "TopLevelPathway",
    "diagram": true,
    "children": [
      {
        "stId": "R-PTI-9031669",
        "name": "Reproductive structur",
        "species": "Populus trichocarpa"
      }
    ]
  }
]
    
```

## Embeddable pathway widget

### Diagram JS

Plant Reactome's DiagramJS widget is our diagram viewer in an ordinary JavaScript API resources in order to display Plant Reactome Pathway Diagrams directly in their web

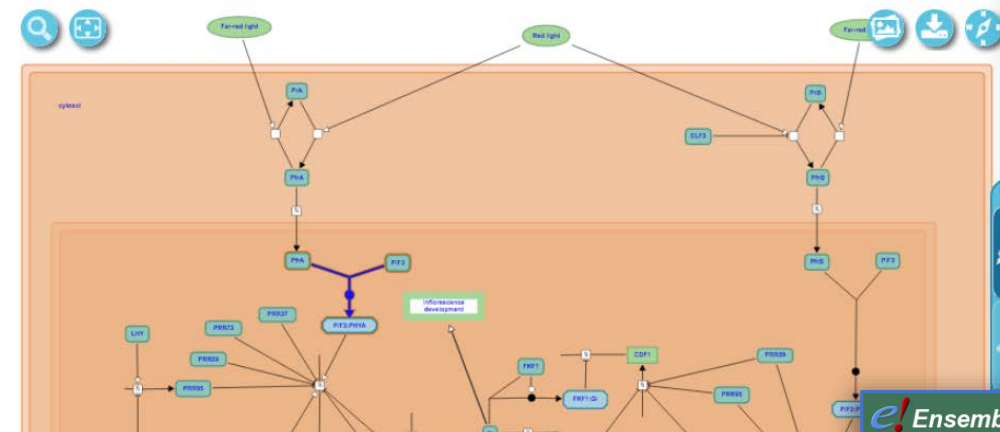

## Client sites

### Reusing Plant Reactome's Diagram Widget?

To reuse our viewer you need to follow the following steps

1. Include the diagram javascript dependency in you HTML header

```
<script type="text/javascript" language="javascript" src="http://plantreactome.com/js/reactome-diagram.js"></script>
```

2. Add a place holder in the body of your web page

```
<div id="diagramHolder"></div>
```

3. Create and initialise the diagram viewer from your javascript code

```
//Creating the Reactome Diagram widget
//Take into account a proxy needs to be set up in your server side pointing
function onReactomeDiagramReady(){ //This function is automatically called
var diagram = Reactome.Diagram.create({
"placeholder" : "diagramHolder",

```

## Javascript instructions

## 1.2 External ID

R-OSA-1119629

from Plant Reactome

## 2 Diagram

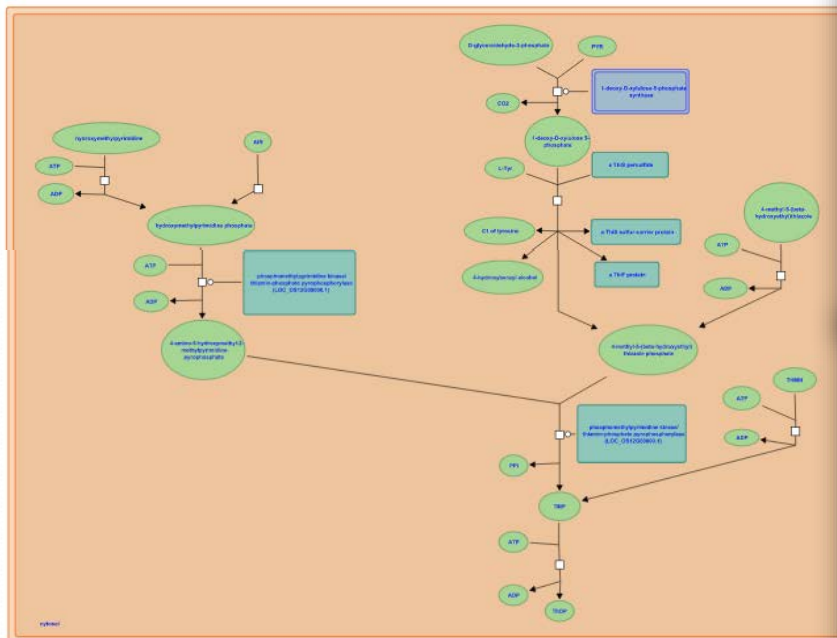

Diagram of thiamine biosynthesis

reactome

## 4 Pathways

3 items [View More Details](#)

[Download](#)

| Pathway                   | Source         | External ID   |
|---------------------------|----------------|---------------|
| Cofactor biosyntheses     | Plant Reactome | R-OSA-2867929 |
| Metabolism and regulation | Plant Reactome | R-OSA-2744345 |
| Thiamin biosynthesis      | Plant Reactome | R-OSA-1119629 |

## 3 Interactions and Pathways

### 3.1 Pathways

3 items [View More Details](#)

[Download](#)

| Pathway                   | Source         | External ID   |
|---------------------------|----------------|---------------|
| Cofactor biosyntheses     | Plant Reactome | R-OSA-2867929 |
| Metabolism and regulation | Plant Reactome | R-OSA-2744345 |
| Thiamin biosynthesis      | Plant Reactome | R-OSA-1119629 |

## 11.2 Pathways

2 items [View More Details](#)

[Download](#)

| Pathway                     | Source         | External ID   |
|-----------------------------|----------------|---------------|
| Thiamin biosynthesis        | Plant Reactome | R-OSA-1119629 |
| Thiamine metabolic pathways | WikiPathways   | WP4297        |

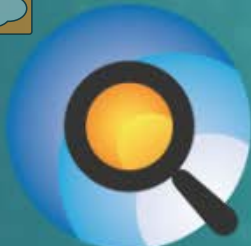

# Expression Atlas

Gene expression across species and biological conditions

## Reciprocal Data Usage

Page-24

Plant Reactome  
Gramene Pathways

Gene name: **TraesCS4D02G183400**  
Organism part: **pericarp**  
Sampling time point: **4 days after pollination**  
Expression level: **2 TPM**  
Number of biological replicates: **1**

## Plant Reactome embeds the ATLAS expression widget

### Results for Circadian rhythm AND Triticum aestivum

Baseline expression | Differential expression

Show anatomograms

Filter your results

Triticum aestivum

Organism part

Developmental stage

Sampling time point

Organism part

Showing 4 experiments:

- Cell Types - Pfeifer - 20 days post ...
- 3 Tissues - Phillips et al
- Cell Types - Pfeifer - 30 days post ...
- Cell Types - Pfeifer - 10 days post ...

## ATLAS references Plant Reactome pathway projections

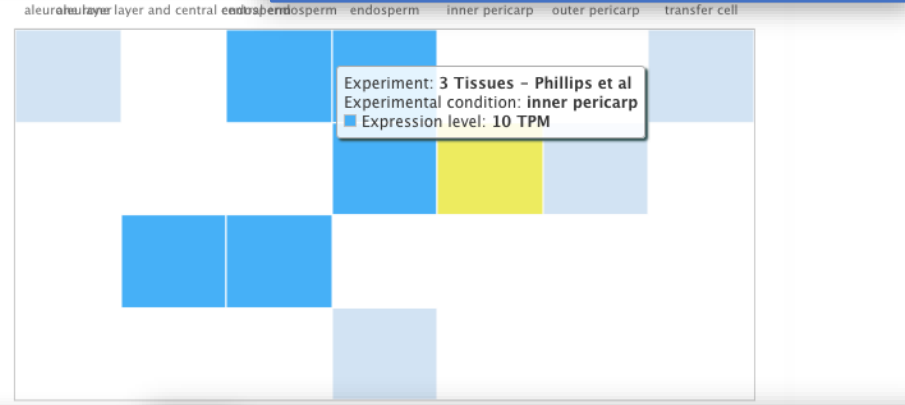

**TraesCS4D02G183400** *Triticum aestivum* Phytochrome

Baseline expression | Differential expression | **TraesCS4D02G183400 information**

**Reactome pathway ID** Circadian rhythm, Long day regulated expression of florigens, Reproductive structure development, Growth developmental processes, Inflorescence development

Log<sub>2</sub> fold change

Display log<sub>2</sub>-fold change

Download results

| Log <sub>2</sub> fold change | Species | Gene name                          | Comparison                                              | Experimental variables    | Experiment name                                                                                                                        |
|------------------------------|---------|------------------------------------|---------------------------------------------------------|---------------------------|----------------------------------------------------------------------------------------------------------------------------------------|
| Highly upregulated (red)     |         | <a href="#">TraesCS6D02G280200</a> | '4 week; cold temperature regimen' vs '2 week; control' | age, environmental stress | Transcription profiling by high throughput sequencing of wheat in response to low temperature                                          |
| Highly upregulated (red)     |         | <a href="#">TraesCS1D02G079100</a> | '4 week; cold temperature regimen' vs '2 week; control' | age, environmental stress | Transcription profiling by high throughput sequencing of wheat in response to low temperature                                          |
| Downregulated (blue)         |         | <a href="#">TraesCS5A02G320300</a> | 'Puccinia striiformis; 48 hour' vs 'control'            | infect, time              | Transcription profiling by high throughput sequencing of the hexaploid wheat line N9134 inoculated with Stripe rust and powdery mildew |
| Downregulated (blue)         |         | <a href="#">TraesCS3A02G081300</a> | '4 week; cold temperature regimen' vs '2 week; control' | age, environmental stress | Transcription profiling by high throughput sequencing of wheat in response to low temperature                                          |

## Supplementary Figure S7
